# Supplementary material for: Vitamin D Supplementation and Adherence to World Cancer Research Fund (WCRF) Diet Recommendations for Colorectal Cancer Prevention: A Nested Prospective Cohort Study of a Phase II Randomized Trial
Source: MDPI journal article supplement (doi:10.3390/biomedicines11061766), 2023-06-20
Supplement: s1 [file s1]

**Supplementary Materials:**

**Supplementary Table S1 list of the participants' events**

| arms      | Data random | Data first event | Type of event |
|-----------|-------------|------------------|---------------|
| Placebo   | 06/09/2016  | 07/05/2021       | polyp         |
|           | 06/10/2016  | 31/08/2020       | polyp         |
|           | 14/11/2016  | 13/12/2021       | polyp         |
|           | 13/12/2016  | 31/05/2022       | relapse       |
|           | 03/02/2017  | 10/01/2022       | polyp         |
|           | 20/02/2017  | 06/05/2021       | other         |
|           | 02/05/2017  | 27/10/2021       | polyp         |
|           | 18/09/2017  | 07/03/2022       | polyp         |
|           | 06/06/2017  | 17/05/2022       | polyp         |
|           | 07/09/2017  | 18/02/2021       | polyp         |
|           | 05/04/2018  | 04/06/2019       | polyp         |
|           | 06/03/2018  | 09/04/2020       | other         |
|           | 12/11/2018  | 17/01/2020       | other         |
|           | 08/06/2018  | 22/03/2019       | relapse       |
|           | 23/10/2018  | 17/09/2020       | polyp         |
| Vitamin D | 01/07/2016  | 01/06/2021       | other         |
|           | 22/07/2016  | 18/05/2020       | polyp         |
|           | 29/07/2016  | 11/09/2020       | polyp         |
|           | 05/08/2016  | 10/02/2020       | polyp         |
|           | 29/09/2016  | 15/10/2020       | polyp         |
|           | 17/10/2016  | 30/11/2021       | polyp         |
|           | 03/03/2017  | 06/05/2021       | polyp         |
|           | 09/03/2017  | 06/05/2021       | relapse       |
|           | 26/06/2017  | 25/05/2022       | polyp         |
|           | 26/07/2017  | 05/05/2021       | relapse       |
|           | 19/10/2017  | 12/11/2019       | polyp         |
|           | 27/04/2018  | 31/07/2018       | relapse       |
|           | 08/06/2018  | 15/07/2020       | polyp         |
|           | 23/03/2018  | 29/06/2021       | polyp         |
|           | 01/08/2018  | 08/02/2019       | polyp         |
|           | 18/02/2019  | 01/11/2019       | relapse       |

Relapse: can be either local recurrences or distant metastasis

Other cancers: 2 breast cancer 1 melanoma and 1 urothelial cancer

**Supplementary Table S2 Biomarkers changes after intervention by arms**

|                             | Placebo       |                           |                           | Vitamin D     |                           |                           |                 |
|-----------------------------|---------------|---------------------------|---------------------------|---------------|---------------------------|---------------------------|-----------------|
| <b>Variable</b>             | <b>Median</b> | <b>Lower<br/>Quartile</b> | <b>Upper<br/>Quartile</b> | <b>Median</b> | <b>Lower<br/>Quartile</b> | <b>Upper<br/>Quartile</b> | <b>P-values</b> |
| <b>VDBP</b> µg/mL           | -9.0          | -35.0                     | 25.0                      | 9.0           | -13.0                     | 46.0                      | 0.1272          |
| <b>25(OH)D</b> ng/mL        | 0.7           | -2.9                      | 4.7                       | 18.5          | 10.3                      | 25.8                      | <.0001          |
| <b>Adiponectin</b><br>µg/mL | 0.3           | -1.1                      | 1.9                       | 0.3           | -0.6                      | 1.4                       | 0.8464          |
| <b>Leptin</b> ng/mL         | 1.0           | -1.2                      | 9.1                       | -0.2          | -2.3                      | 8.1                       | 0.938           |
| <b>IL_10</b> pg/mL          | 0.1           | -0.3                      | 0.7                       | 0.1           | -0.2                      | 0.6                       | 0.0884          |
| <b>IL_6</b> pg/mL           | 0.1           | -0.7                      | 0.9                       | 0.0           | -0.4                      | 1.6                       | 0.3117          |
